# Supplementary material for: Mitochondrial movement during its association with chloroplasts in Arabidopsis thaliana
Source: PubMed Central journal article supplement (PMC7935954; doi:10.1038/s42003-021-01833-8), 2021-03-05
Supplement: 42003_2021_1833_MOESM2_ESM.pdf [file 42003_2021_1833_MOESM2_ESM.pdf]

**Supplementary information**

**Oikawa, K. *et al.***

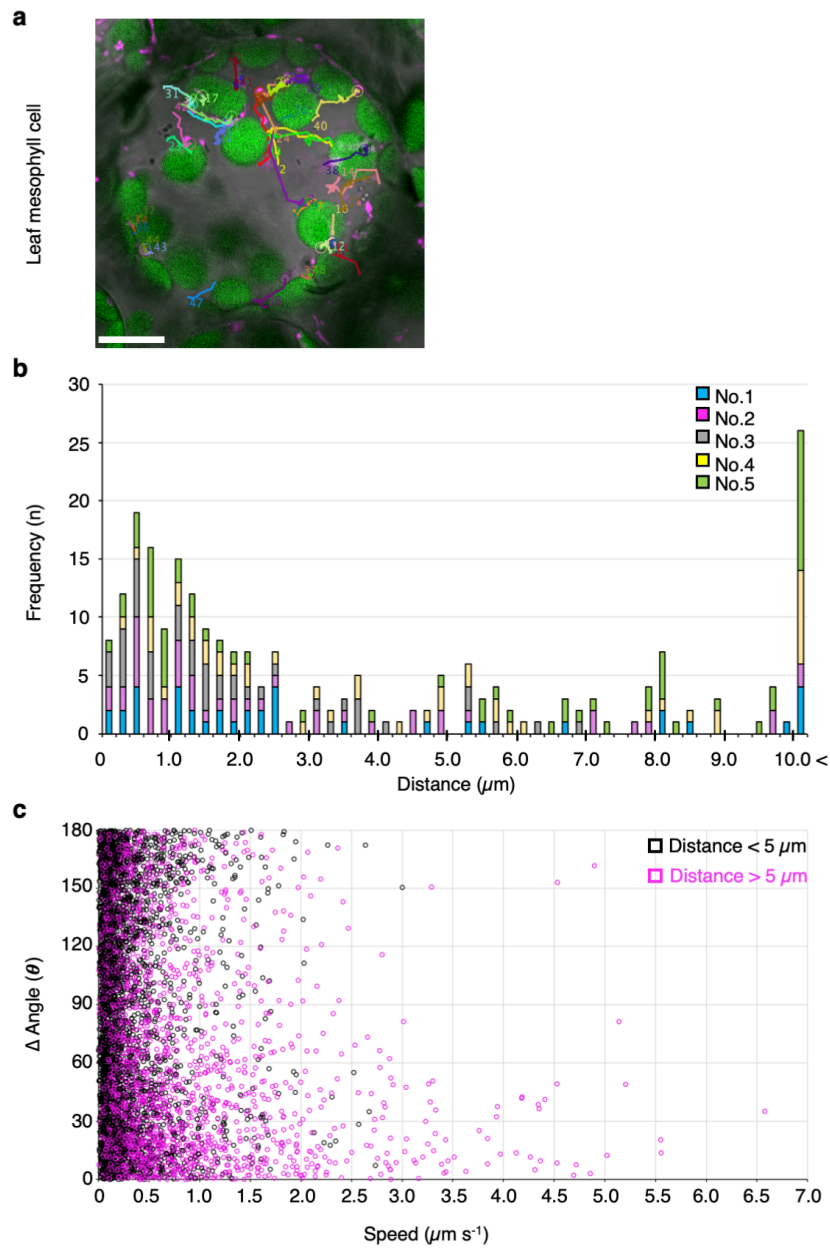

**Supplementary Fig. 1 Characterization of mitochondrial movements in leaf mesophyll cells.** **a** Representative image of the trajectories of mitochondrial movements acquired from time-lapse analysis of images of leaf palisade mesophyll cells taken for 30 s at 250-ms intervals. Scale bar; 10  $\mu\text{m}$ . **b** Distribution of the distance between the first and last points in trajectories of mitochondrial movements (leaf cell No. 1, blue (n=34); leaf cell No. 2, magenta (n=45); leaf cell No. 3, gray (n=57); leaf cell No. 4, yellow (n=46), and leaf cell No. 5, green (n=64)). **c** Scatter plot of speed (x-axis) and angle changes (y-axis) of mitochondria at each time point acquired from the trajectories of mitochondrial movement, which are separated into migration distances shorter (open circles) or longer (filled, magenta circles) than 5.0  $\mu\text{m}$  in (**b**).

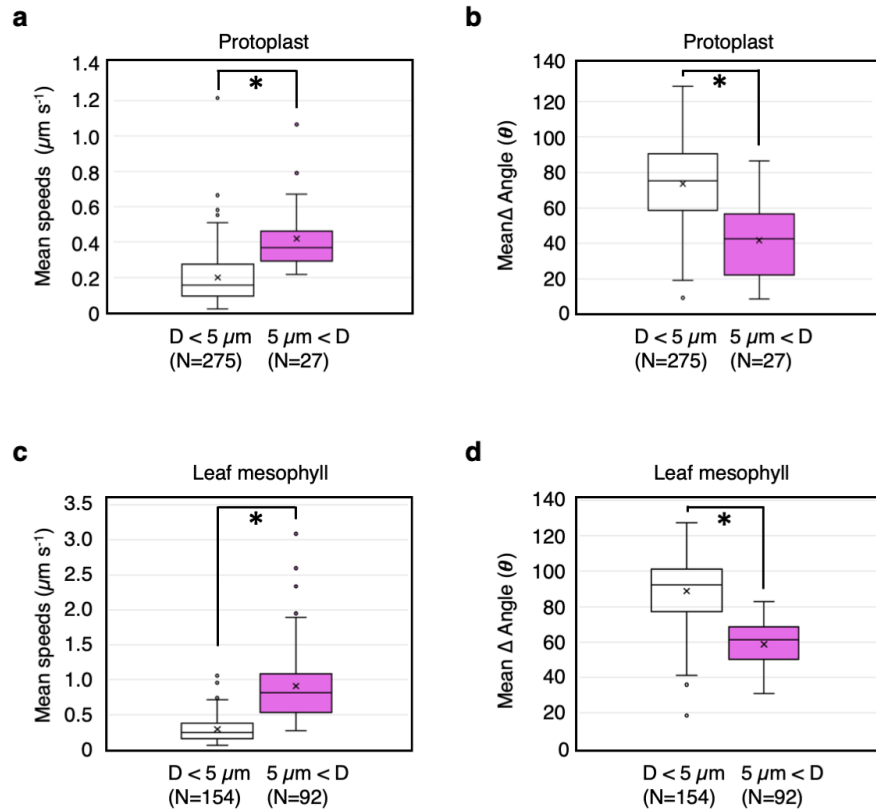

**Supplementary Fig. 2 Comparison of mean speeds and angle change of mitochondria between short- or long-distance migration. a,c** Mean speed of mitochondria from both mitochondria in short ( $D < 5\mu\text{m}$ )- and long ( $5\mu\text{m} < D$ )- distance migration in protoplasts (a) and leaf mesophyll cells (c). **b,d** Mean angle change ( $\Delta$  Angle ( $\theta$ )) of mitochondria from both mitochondria in short ( $D < 5\mu\text{m}$ )- and long ( $5\mu\text{m} < D$ )- distance migration in protoplasts (b) and leaf mesophyll cells (d). \* $P < 0.01$  (Student's-*t* test; 3.39E-06 in (a), 9.01E-08 in (b), 7.39E-20 in (c), and 2.26E-22 in (d)).

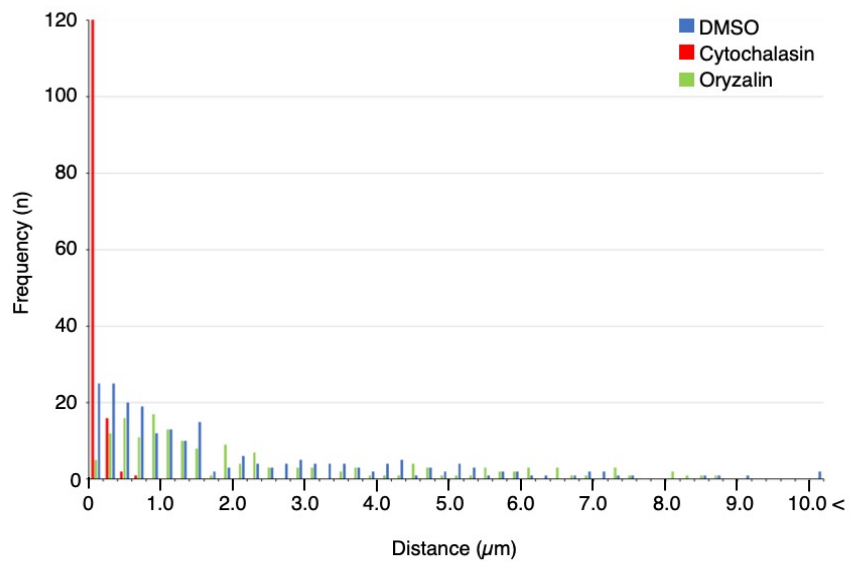

**Supplementary Fig. 3 Effect of cytoskeletal inhibitors on the distance of mitochondrial migration.** Distribution of the distance between the first and last points in trajectories of mitochondrial movement. DMSO (n=209), blue; cytochalasin B (n=181), red; and oryzalin (n=200), green.

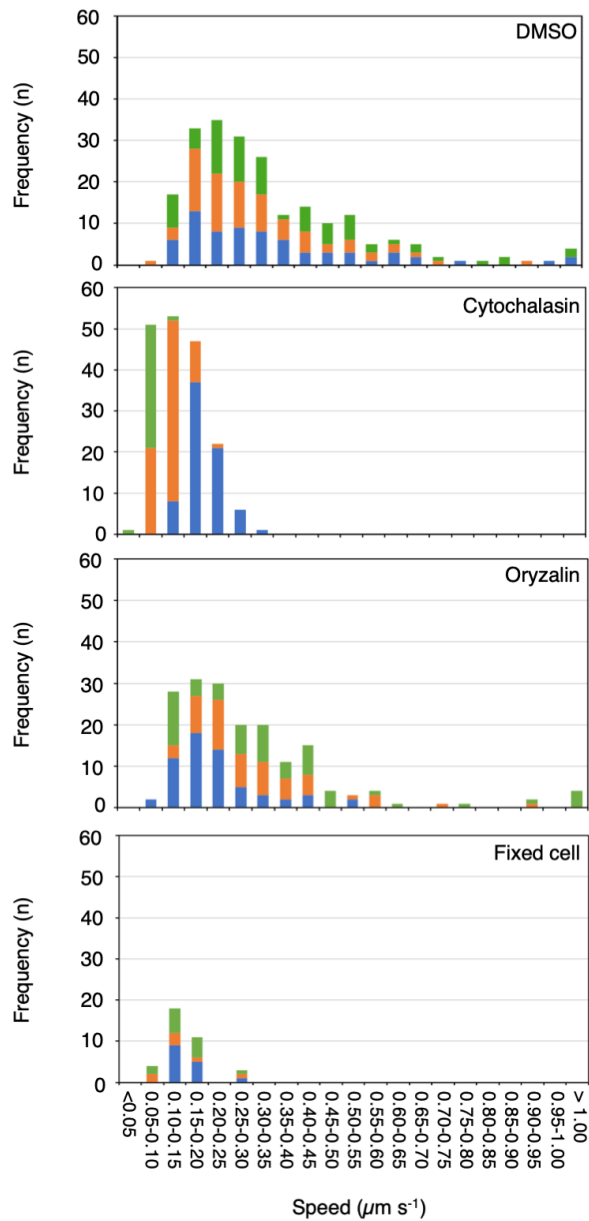

**Supplementary Fig. 4** Effects of cytoskeletal inhibitors on the speed distribution of mitochondrial movement. Speed distribution of mitochondrial movement from three independent protoplasts (protoplast No. 1, blue; protoplast No. 2, orange; and protoplast No. 3, green) treated with DMSO (n=209), cytochalasin B (an F-actin-disrupting drug) (n=181), and oryzalin (a microtubule-disrupting drug) (n=200). Thirty-six mitochondria from three independent protoplasts were analyzed in fixed cells.

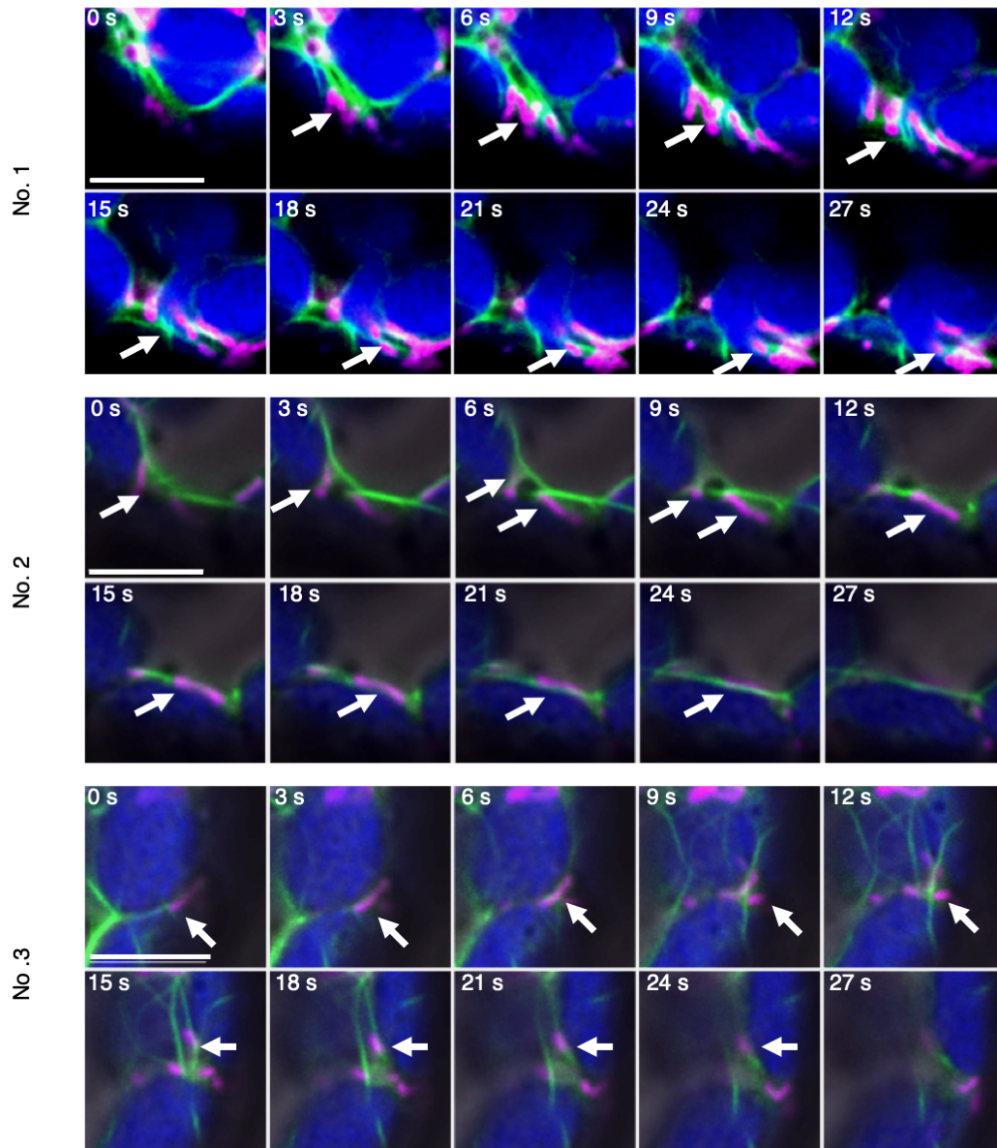

**Supplementary Fig. 5 Association of mitochondria and F-actin on chloroplasts.** Representative images are acquired from time-lapse analysis of three protoplasts (No.1-3) expressing both the pGWT35S-Lifeact-Citrine and MT-RFP for visualizing F-actin (green) and mitochondrion (magenta). The interaction between mitochondria, F-actin, and chloroplasts (blue) are shown (white arrows). Scale bars: 5  $\mu$ m.

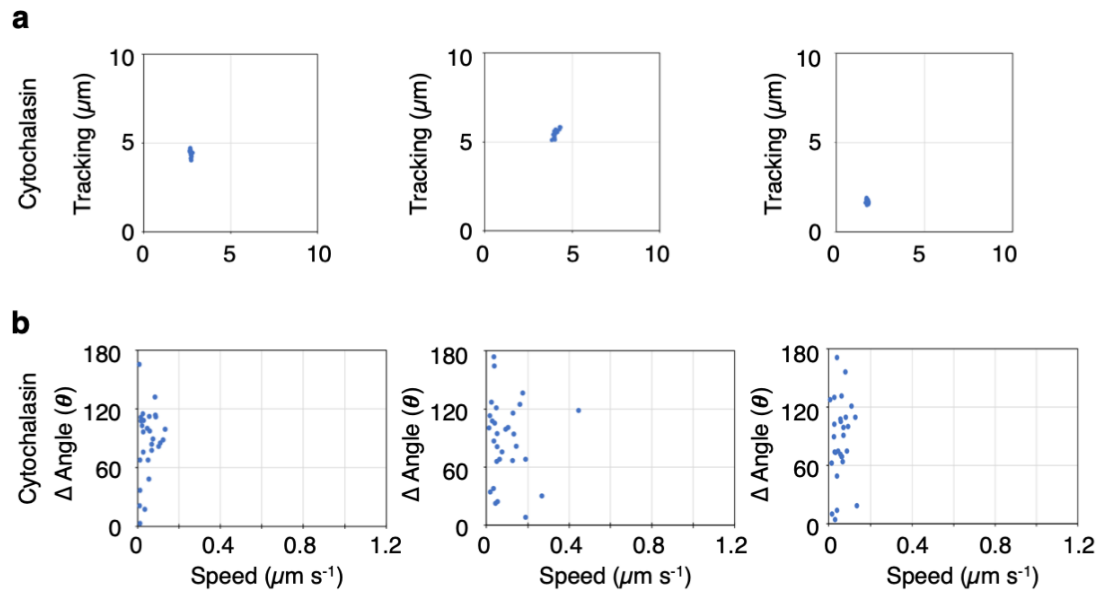

**Supplementary Fig. 6 Characterization of mitochondrial movements in cytochalasin-treated protoplasts expressing Lifeact-Citrine gene. a, b** Representative trajectories (a) and scatter plot of speed and angle changes (b) of three movements of mitochondria obtained from three protoplasts treated with 500  $\mu\text{M}$  cytochalasin.

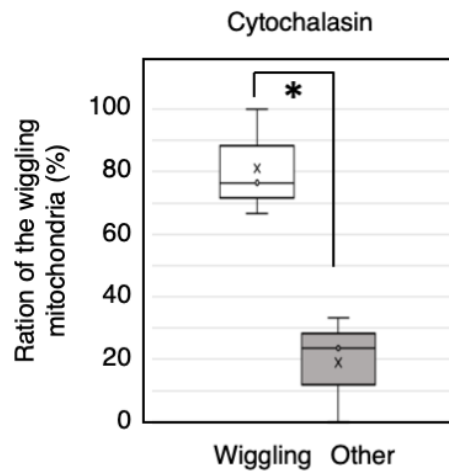

**Supplementary Fig. 7 Number of wiggling mitochondria in F-actin-disrupted protoplasts.** Ratio of number of wiggling mitochondria with chloroplast to total number of mitochondria in cytochalasin-treated protoplasts expressing pGWT35S-Lifeact-Citrine gene.  $*P < 0.01$  (Student's *t* test).



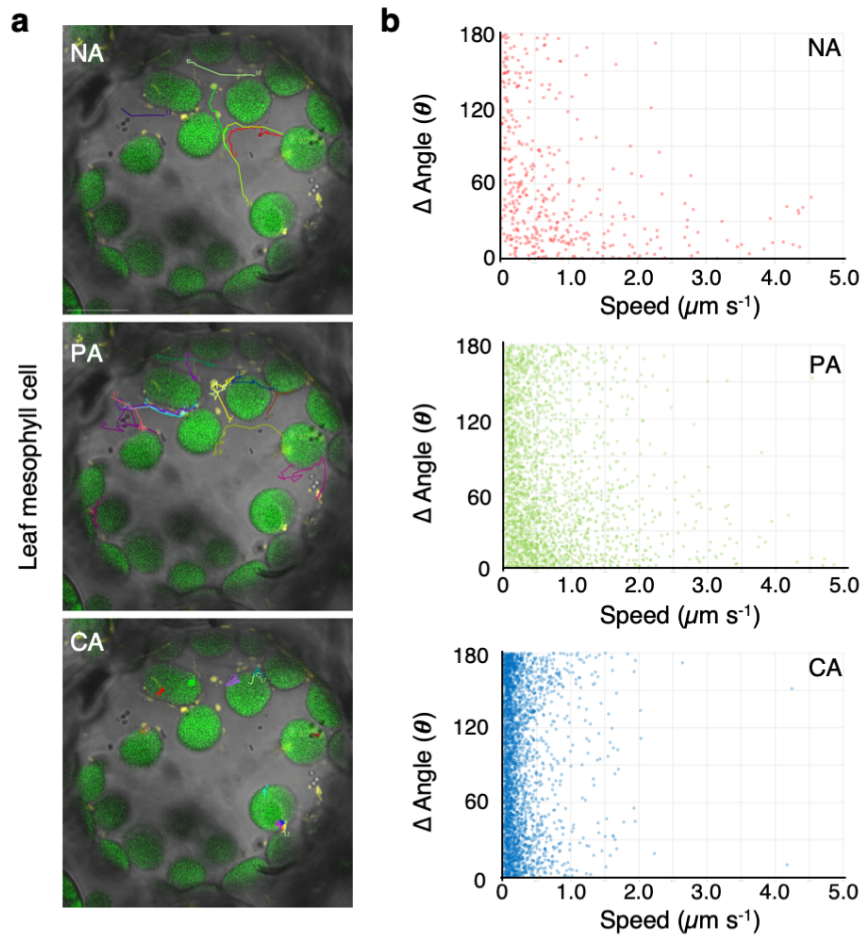

**Supplementary Fig. 8 Mitochondrial movements in leaf mesophyll cells are influenced by their association with chloroplasts.** **a** Two representative images of three types of mitochondrial movements: no association (NA), partial association (PA), and continuous association (CA) with chloroplasts. Trajectories of mitochondrial movements were constructed from time-lapse analysis of images acquired for 30 s at 250-ms intervals. Scale bar: 10  $\mu\text{m}$ . **b** Scatter plot of speed (x-axis) and angle changes (y-axis) of three different types of mitochondrial movements: NA (red), PA (green), and CA (blue) at each time point acquired from the trajectories of mitochondrial movements in three different protoplasts.

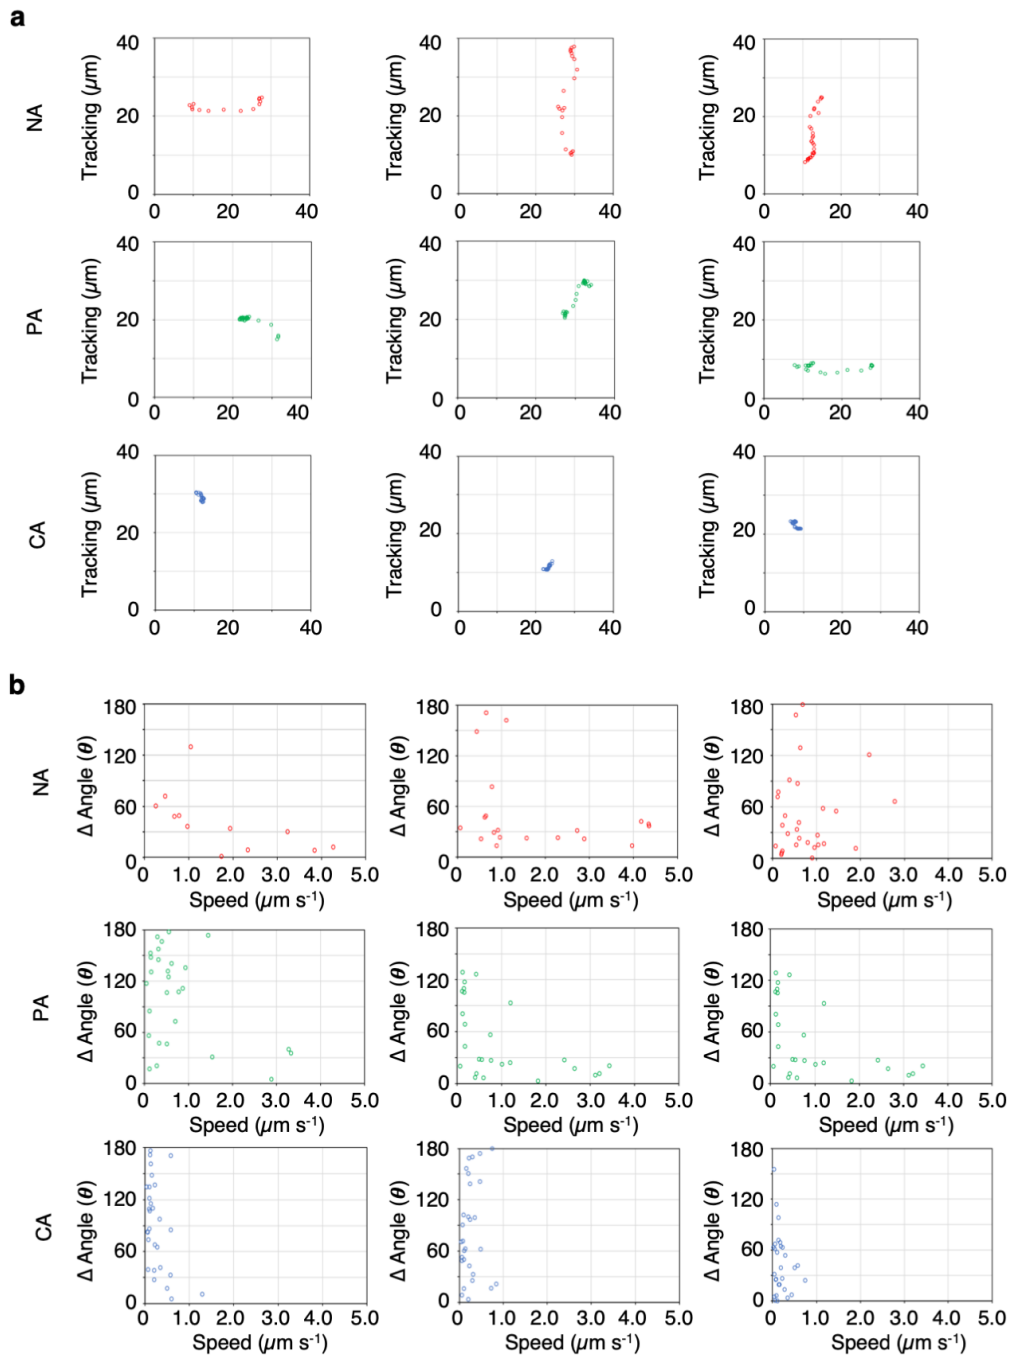

**Supplementary Fig. 9 Characterization of three distinct movements of mitochondria associated with chloroplast in leaf mesophyll cells. a, b** Representative trajectories (a) and scatter plots of speed and angle changes (b) of three mitochondrial movements were classified as no association, NA (upper panels); partial association, PA (middle panels); and continuous association, CA (lower panels) with chloroplasts in leaf mesophyll cells.

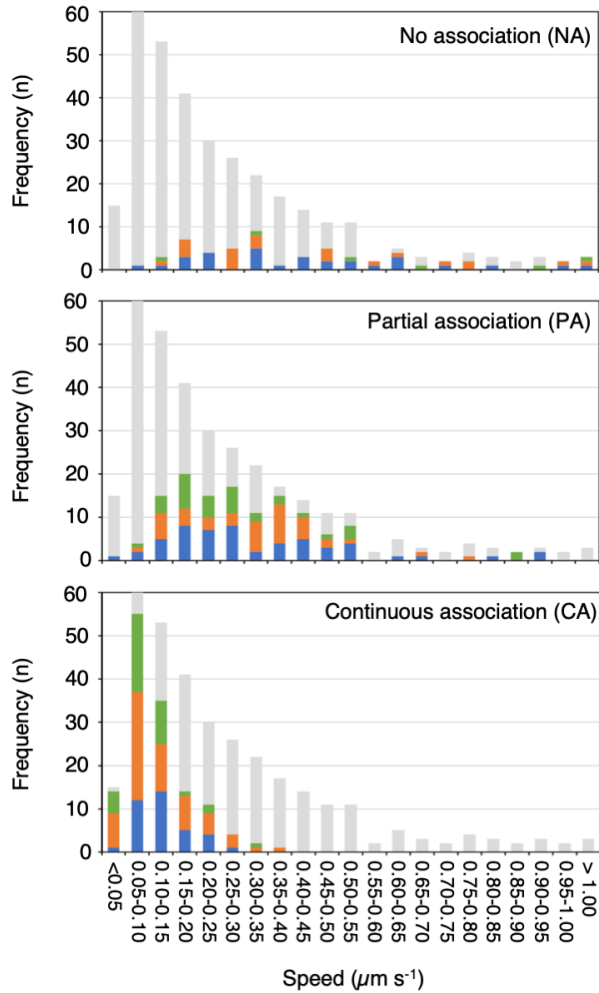

**Supplementary Fig. 10 Relationship between mitochondrial speed and association with chloroplasts.** Frequency of speeds among mitochondria with no association (NA, n=58), partial association (PA, n=138), and continuous association (CA, n=139) with chloroplasts.

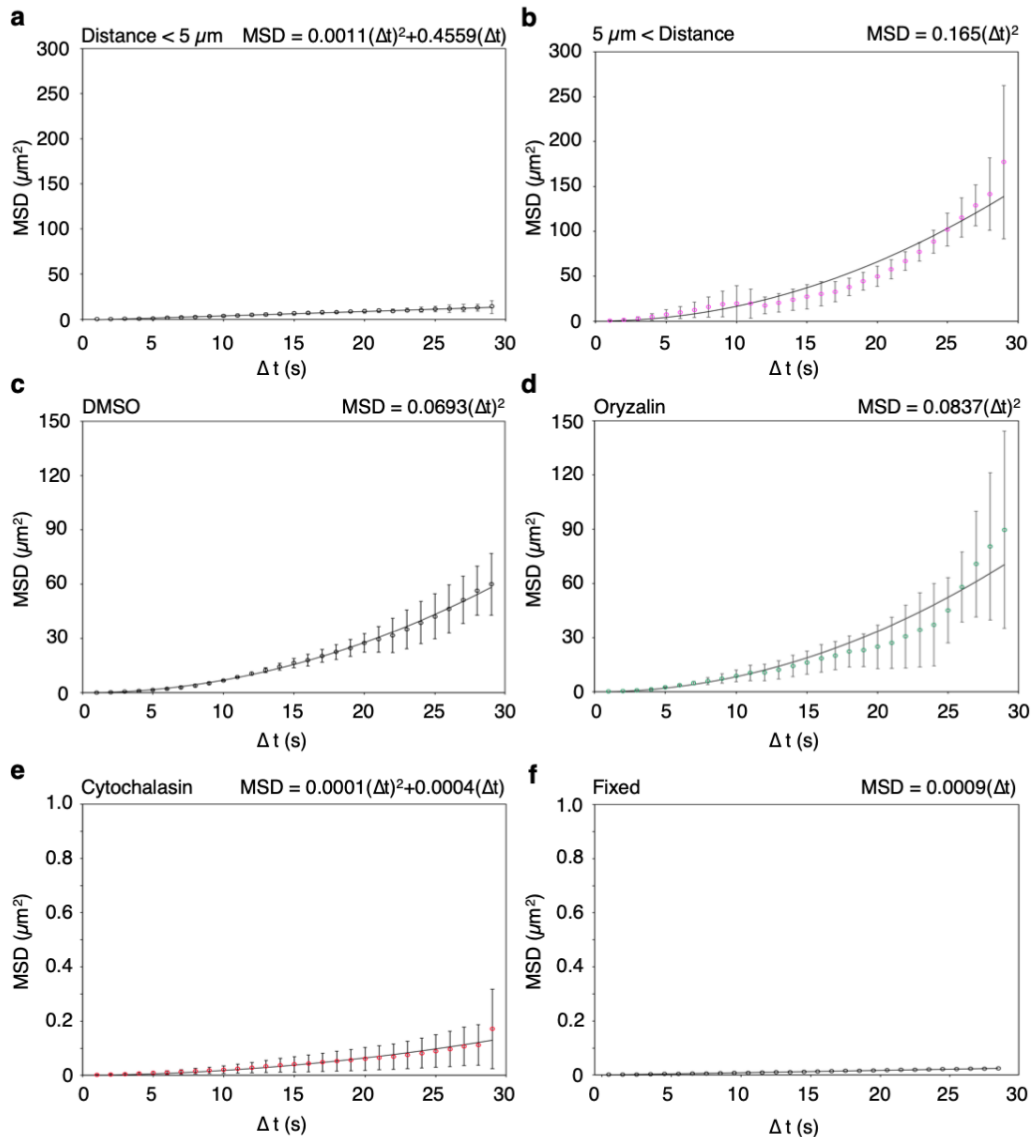

**Supplementary Fig. 11 MSD analysis of mitochondrial movement.** **a-f** Each plot are fitted to liner or curve models using the least-squares method with the Eq 2. **a, b** The mean squared displacement (MSD) of mitochondrial movements, which are separated to shorter (open circles) or longer (filled-magenta circles) than 5.0  $\mu\text{m}$  distance. **c-e** MSD analysis for mitochondrial movement in DMSO-, oryzalin-, and cytochalasin-treated cells. **f** MSD analysis for mitochondria movement in fixed cell.

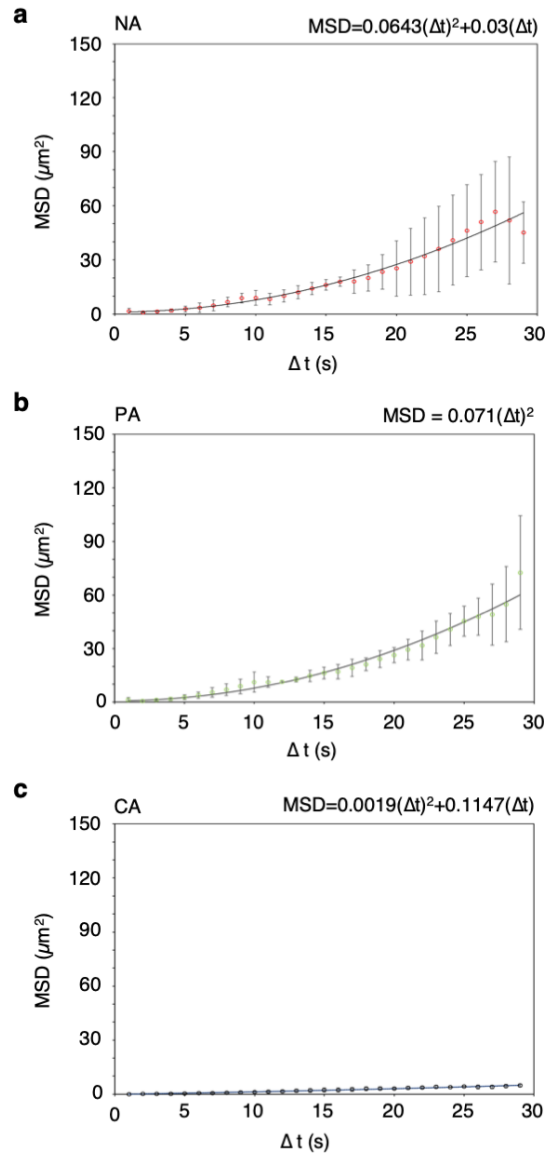

**Supplementary Fig. 12 MSD analysis of mitochondrial movement associating with or without chloroplast.** Each plot is fitted to curve models using the least-squares method with the Eq 2. **a-c** The mean squared displacement (MSD) analysis of three types of mitochondrial movements; no association (NA; **a**), partial association (PA; **b**), and continuous association (CA; **c**) with chloroplasts.

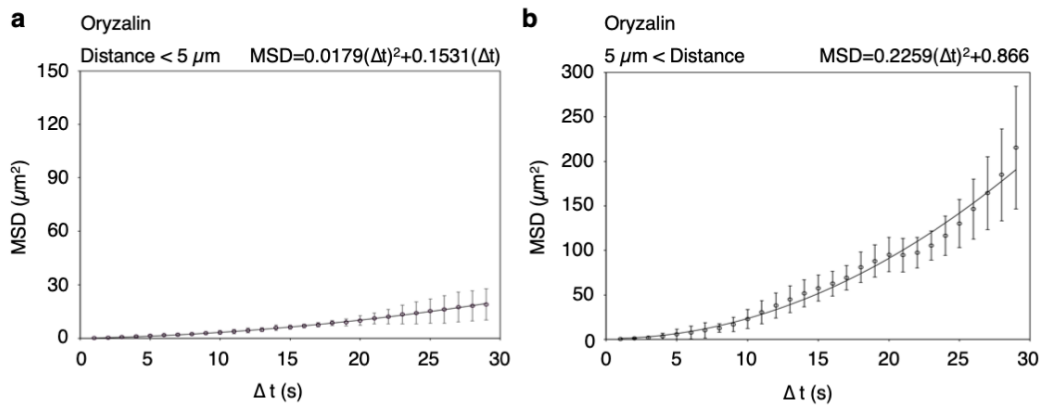

**Supplementary Fig. 13 MSD analysis of mitochondrial movement in oryzalin-treated cell.**

Each plot is fitted to curve models using the least-squares method with the Eq 2. **a, b** The mean squared displacement (MSD) of mitochondrial movement in oryzalin-treated cells, which are separated to shorter (**a**) or longer (**b**) than 5.0  $\mu\text{m}$ -migrate distance.

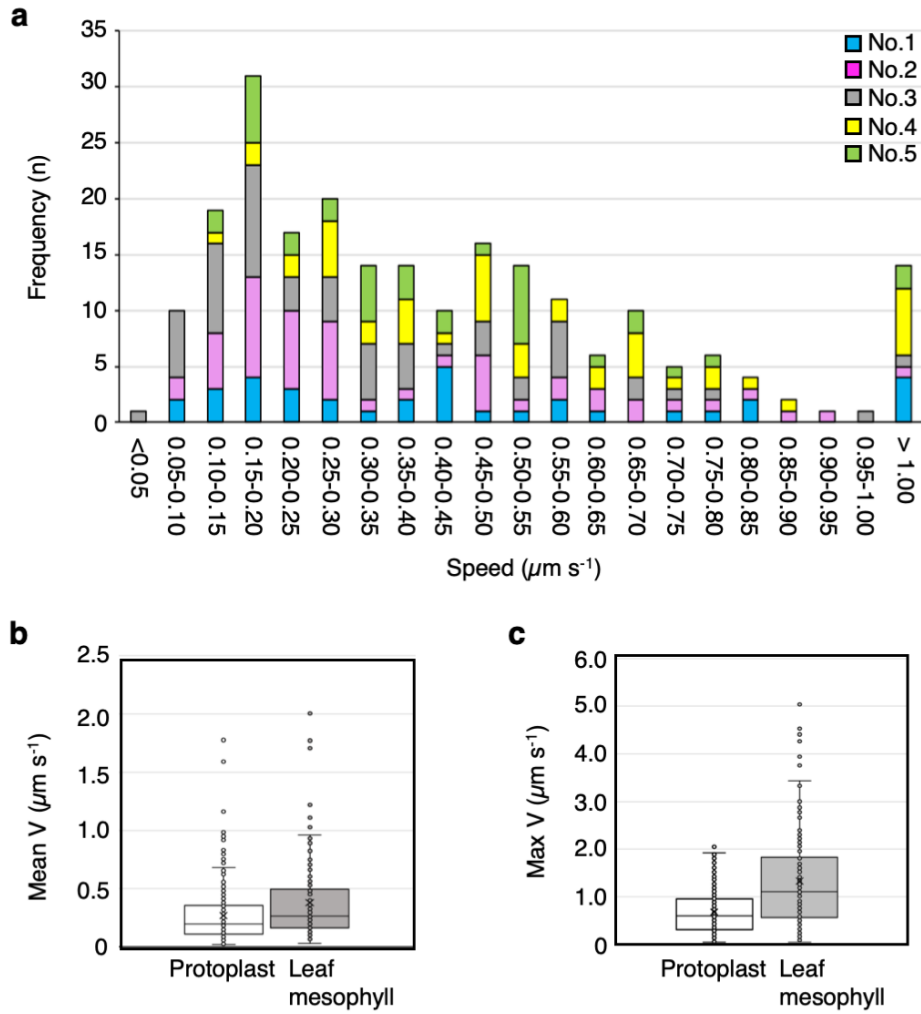

**Supplementary Fig. 14 Comparison of speeds of mitochondrial movement between protoplast and leaf mesophyll cells. a** Speed distribution of mitochondrial movement from five independent leaf mesophyll cells (No.1, blue, n=34; No. 2, magenta, n=45; No. 3, gray, n=57; No. 4, yellow, n=46; and No. 5, green, 64). **b, c** Mean (**b**) and maximum (Max) (**c**) velocity (V) of mitochondria in leaf mesophyll protoplasts and leaf mesophyll cells are shown as box plots.

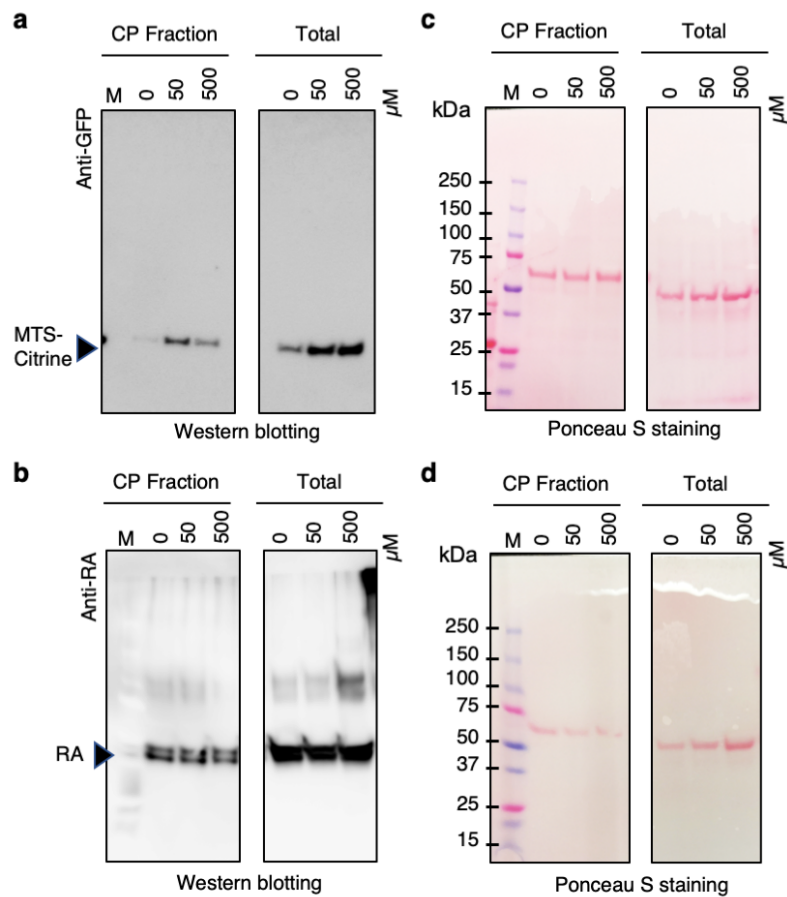

**Supplementary Fig. 15 Co-isolation analysis of mitochondria and chloroplasts. a, b** Western blot analysis of the isolated-chloroplast fraction (left) or total-leaf extract (right) using antibodies against GFP (**a**) or RuBisCO activase (RA) (**b**). MTS-Citrine at 28kD (**a**) and RA at 45kD (**b**) (arrow heads) are detected in both CP fraction and total leaf extraction from 0  $\mu\text{M}$ , 50  $\mu\text{M}$  and 500  $\mu\text{M}$  cytochalasin-treated cells. **c, d** The images (**c, d**) show the equal loading of western blotting proteins (**a, b**) after transferred onto the PVDF membrane and stained with the Ponceau S solution.



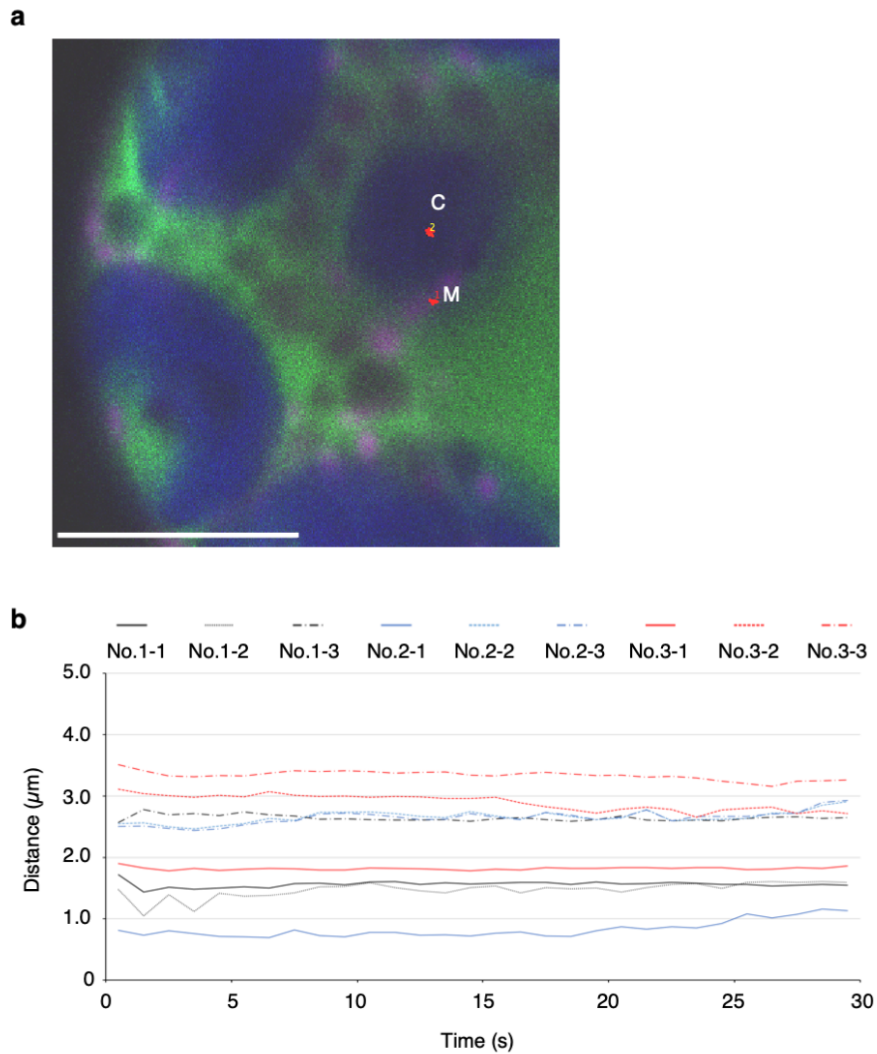

**Supplementary Fig. 16 Interaction between mitochondrion and chloroplast in F-actin-disrupted protoplasts.** **a** Representative image of trajectories of mitochondria (magenta) and chloroplast (blue) in a cytochalasin-treated protoplast, which expresses pGWT35S-Lifeact-Citrine gene (green). Time-lapse images were acquired for 30 s at 1-s intervals. Trajectory within 30 s of centroid of chloroplast (C) and mitochondrion (M) are shown as red color. Scale bar; 5  $\mu\text{m}$ . **b** Distance between centroid of mitochondria and chloroplasts at each time points in 30 s are shown as lines. Each three set of chloroplast and mitochondrion (1-3) from three protoplasts (No. 1-3) is shown as different colors and lines (No. 1-1 to No. 3-3).

**Supplementary Table 1.** F-actin-independent association between mitochondria and chloroplasts. Number of mitochondria with or without actin filaments (FA) on chloroplasts in cytochalasin B-treated protoplasts.

|                                 | <b>With FA</b> | <b>Without FA</b> | <b>Total</b> |
|---------------------------------|----------------|-------------------|--------------|
| <b>DMSO</b>                     | 146            | 122               | 268          |
| <b>50 <math>\mu</math>M CB</b>  | 15             | 280               | 295          |
| <b>500 <math>\mu</math>M CB</b> | 15             | 206               | 221          |

**Supplementary Table 2.** Number of three types of mitochondrial movements associated with or without chloroplasts in three protoplasts. NA; no association, PA; partial association, and CA; continuous association.

| <b>Protoplast</b> | <b>NA</b> | <b>PA</b> | <b>CA</b> | <b>Total</b> |
|-------------------|-----------|-----------|-----------|--------------|
| <b>No.1</b>       | 24        | 57        | 37        | 118          |
| <b>No.2</b>       | 25        | 46        | 64        | 135          |
| <b>No.3</b>       | 9         | 33        | 38        | 80           |
| <b>Sum</b>        | 58        | 136       | 139       | 333          |

**Supplementary Table 3.** Number of three types of mitochondrial movements associated with or without chloroplasts in leaf mesophyll cells. NA; no association, PA; partial association, and CA; continuous association.

| <b>Leaf cells</b> | <b>NA</b> | <b>PA</b> | <b>CA</b> | <b>Total</b> |
|-------------------|-----------|-----------|-----------|--------------|
| <b>No. 1</b>      | 3         | 13        | 20        | 36           |
| <b>No. 2</b>      | 5         | 25        | 16        | 46           |
| <b>No. 3</b>      | 2         | 36        | 28        | 66           |
| <b>No. 4</b>      | 7         | 14        | 40        | 61           |
| <b>No. 5</b>      | 3         | 10        | 30        | 43           |
| <b>Sum</b>        | 20        | 98        | 134       | 252          |

**Supplementary Table 4.** Parameter of MSD analysis and character of mitochondrial movements. *D*: Diffusion coefficient, *v*: mean velocity, MD: migrate distance, NA: No association with chloroplast, PA: partial association with chloroplast, CA: continuous association with chloroplast, Dire: Direct, and Diff: Diffusion. The chi-squared value,  $\chi^2$  and p-value to test the goodness of fit about the MSD analysis fits are shown.

|                                                          | <i>D</i> ( $\mu\text{m}^2 \text{s}^{-1}$ ) | <i>v</i> ( $\mu\text{m/s}$ ) | Pattern     | $\chi^2$ | P – value |
|----------------------------------------------------------|--------------------------------------------|------------------------------|-------------|----------|-----------|
| <b>MD &lt; 5 <math>\mu\text{m}</math></b>                | 0.11                                       | 0.0332                       | Dire + Diff | 1.00     | 0.317     |
| <b>5 <math>\mu\text{m}</math> &lt; MD</b>                | -                                          | 0.406                        | Dire        | 6.69E-05 | 0.993     |
| <b>DMSO</b>                                              | -                                          | 0.263                        | Dire        | 1.00     | 0.317     |
| <b>Oryzalin</b>                                          | -                                          | 0.289                        | Dire        | 0.419    | 0.517     |
| <b>MD &lt; 5 <math>\mu\text{m}</math><br/>(Oryzalin)</b> | 0.038                                      | 0.134                        | Dire + Diff | 1.00     | 0.317     |
| <b>5 <math>\mu\text{m}</math> &lt; MD<br/>(Oryzalin)</b> | -                                          | 0.475                        | Dire        | 0.931    | 0.334     |
| <b>Cytochalasin</b>                                      | 0.00010                                    | 0.0100                       | Dire + Diff | 1.00     | 0.317     |
| <b>NA</b>                                                | 0.00075                                    | 0.254                        | Dire + Diff | 1.00     | 0.317     |
| <b>PA</b>                                                | -                                          | 0.267                        | Dire        | 1.00     | 0.317     |
| <b>CA</b>                                                | 0.029                                      | 0.0436                       | Dire + Diff | 0.587    | 0.444     |
| <b>Fixed</b>                                             | 0.00023                                    | -                            | Brownian    | 1.00     | 0.317     |

**Supplementary Table 5.** Number of mitochondria associated with or without chloroplast in 500  $\mu$ M CB-treated protoplasts. SD: standard deviation. Student's t-test (With chloroplast vs Without chloroplast):  $1.341E^{-19}$

| <b>No.</b>            | <b>With</b>                 | <b>Without</b>              | <b>Total No.</b>         |
|-----------------------|-----------------------------|-----------------------------|--------------------------|
| <b>Protoplast (n)</b> | <b>chloroplast (%) (SD)</b> | <b>chloroplast (%) (SD)</b> | <b>Mitochondrion (n)</b> |
| 10                    | 92.8 (5.1)                  | 8.1 (3.5)                   | 726                      |
