# Supplementary material for: Mitochondrial movement during its association with chloroplasts in Arabidopsis thaliana
Source: PubMed Central journal article supplement (PMC7935954; doi:10.1038/s42003-021-01833-8), 2021-03-05
Supplement: 42003_2021_1833_MOESM3_ESM.pdf [file 42003_2021_1833_MOESM3_ESM.pdf]

## **Description of Additional Supplementary Files**

**File name:** Supplementary Movie 1

**Description:** Mitochondrial movement in a protoplast. Time-lapse images of mitochondria (green) and chloroplasts (magenta) observed by confocal laser-scanning microscopy. The number at the top right indicates the time in seconds.

**File name:** Supplementary Movie 2

**Description:** Mitochondrial movement in a protoplast. Time-lapse images of mitochondria (green) and chloroplasts (magenta) observed by confocal laser-scanning microscopy with trajectories of mitochondrial movements. The number at the top right indicates the time in seconds.

**File name:** Supplementary Movie 3

**Description:** Mitochondrial movement in an oryzalin-treated protoplast. Time-lapse images of mitochondria (green) and chloroplasts (magenta) observed by confocal laser-scanning microscopy. The number at the top right indicates the time in seconds.

**File name:** Supplementary Movie 4

**Description:** Mitochondrial movement in an oryzalin-treated protoplast. Time-lapse images of mitochondria (green) and chloroplasts (magenta) observed by confocal laser-scanning microscopy with trajectories of mitochondrial movements. The number at the top right indicates the time in seconds.

**File name:** Supplementary Movie 5

**Description:** Mitochondrial movement in a cytochalasin-treated protoplast. Time-lapse images of mitochondria (green) and chloroplasts (magenta) observed by confocal laser-scanning microscopy. The number at the top right indicates the time in seconds.

**File name:** Supplementary Movie 6

**Description:** Mitochondrial movement in a cytochalasin-treated protoplast. Time-lapse images of mitochondria (green) and chloroplasts (magenta) observed by confocal laser-scanning microscopy with trajectories of mitochondrial movements. The number at the top right indicates the time in seconds.

**File name:** Supplementary Movie 7

**Description:** Wiggling of mitochondria associated with a chloroplast in a cell treated with 50  $\mu\text{M}$  cytochalasin B. Wiggling of mitochondria (arrow) associated with a chloroplast. The number at the top right indicates the time in seconds.

**File name:** Supplementary Movie 8

**Description:** Wiggling of mitochondria associated with a chloroplast in a cell treated with 500  $\mu\text{M}$  cytochalasin B from MTS-Citrine transgenic *A. thaliana*. Wiggling of mitochondria (arrow) associated with a chloroplast. The number at the top right indicates the time in seconds.

**File name:** Supplementary Movie 9

**Description:** False mitochondrial movement (fluorescence fluctuation) in a fixed cell. Time-lapse images of fixed mitochondria (green) observed by confocal laser-scanning microscopy. Only false movement due to fluorescence fluctuation could be observed. The number at the top right indicates the time in seconds.

**File name:** Supplementary Movie 10

**Description:** Wiggling of mitochondria associated with a chloroplast. Cropped video from Supplemental Movie 1 showing wiggling of mitochondria (arrow) associated with a chloroplast. The number at the top right indicates the time in seconds.

**File name:** Supplementary Movie 11

**Description:** Mitochondrial movement in a leaf palisade mesophyll cell. Time-lapse images of mitochondria (green) and chloroplasts (magenta) observed by confocal laser-scanning microscopy. The number at the top right indicates the time in seconds.

**File name:** Supplementary Movie 12

**Description:** Interaction between mitochondrion and chloroplast in F-actin-disrupted protoplast. Time-lapse images of a leaf protoplast expressing pGWT35S-Lifeact-Citrine gene (green) were acquired for 30 s at 250-ms intervals by confocal laser-scanning microscopy. The centroid of mitochondria (magenta) and chloroplast (blue) were shown as red color.

**File name:** Supplementary Data 1

**Description:** Source data underlying plots shown in figures.
